# Supplementary material for: N-, P- and B-doped mesoporous carbons for direct dehydrogenation of propane
Source: Royal Society of Chemistry journal article supplement (doi:10.1039/c6ra20726j), 2016-01-01
Supplement: c6ra20726j1.pdf [file c6ra20726j1.pdf]

## Supporting Information

### N-, P- and B-doped Mesoporous Carbons for Direct Dehydrogenation of Propane

Yuejun Song,<sup>1,2</sup> Guishu Liu,<sup>1,2</sup> Zhong-Yong Yuan<sup>1,2,#</sup>

<sup>1</sup> National Institute for Advanced Materials, School of Materials Science and Engineering, Nankai University, Tongyan Road 38, Haihe Educational Park, Tianjin 300353, China

<sup>2</sup> Key Laboratory of Advanced Energy Materials Chemistry (Ministry of Education), Collaborative Innovation Center of Chemical Science and Engineering (Tianjin), Nankai University, Weijin Road 94, Tianjin 300071, China

# Corresponding author. Email: zyyuan@nankai.edu.cn

## 1. Experimental Section.

### 1.1 Materials

All the chemical reagents used below were purchased from Tianjin Guangfu Fine Chemical Research Institute Co., Ltd and used without any purification further.

### 1.2 Catalyst preparation

**Preparation of oxidic NMC (NMC-o).** The prepared NMC was oxidized by nitric acid. Typically, NMC was oxidized NMC in 10 mol/L nitric acid for 8 h, then washed with deionized water to neutral. After drying at 80 °C, the resulted produce was marked as NMC-o.

**Preparation of N-doped mesoporous carbon by melamine (NMC-m).** As reported by Zhao's group with some adjustment.[1] 1 g mesoporous carbon was put into a 100 ml solution with 10 g melamine at 80 °C under stirring for 8 h. After water evaporated, the precipitate was dried in oven at 100 °C and heated up to 750 °C at 2.5 °C/min and kept for 1 h in a N<sub>2</sub> atmosphere. The obtained product was denoted as NMC-m.

**Preparation of N-doped mesoporous carbon by urea (NMC-u).** The N-doped mesoporous carbon were synthesized by in-situ approach.[2] 1.41 g phenol, 0.45 g urea and 0.03 g sodium hydroxide were dissolved in 3 mL water under stirring, and then 2.5 g formaldehyde (37%) was added drop-wise. After heating up to 90 °C slowly and held 30 min, a phenol-urea-formaldehyde (PUF) resin was prepared. The obtained PUF resin was dissolved in 40 mL mixture of ethanol and water ( $V_{\text{ethanol}}: V_{\text{water}} = 1:1$ ), then 2.5 g F127 added into the above solution under stirring. When F127

dissolved completely,  $\sim 2$  g HCl (37%) were used to adjust the pH value of the mixture to  $\sim 2.0$ . The mixture continues to be stirred at  $50\text{ }^{\circ}\text{C}$  for 12 h, then evaporating the solvent under vacuum environment at  $50\text{ }^{\circ}\text{C}$ . The obtained gel-like precipitate further aged at  $100\text{ }^{\circ}\text{C}$  for another 24 h, followed by calcination to  $600\text{ }^{\circ}\text{C}$  at  $1\text{ }^{\circ}\text{C}/\text{min}$  for 3 h under nitrogen atmosphere. The obtained product was labeled as NMC-u.

## 2. Supplementary Figures and Tables

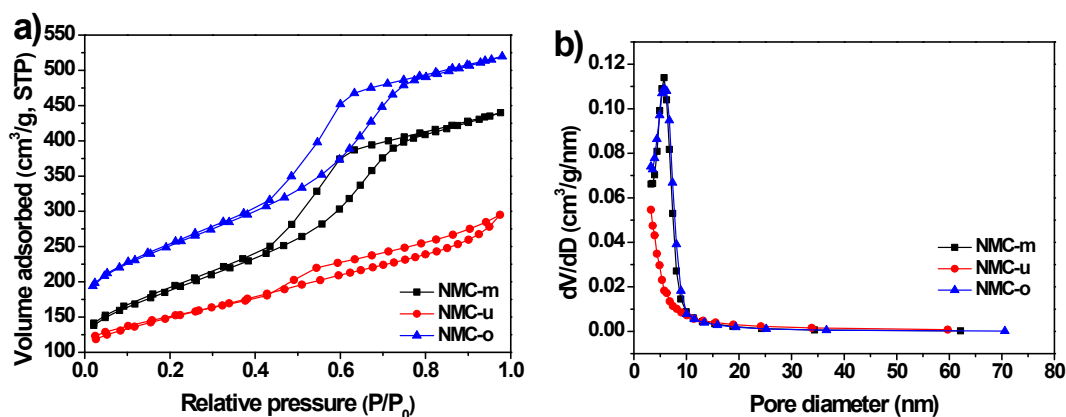

Fig. S1  $\text{N}_2$  sorption isotherms (a) and the corresponding pore size distribution curves (b) of the N-doped carbons.

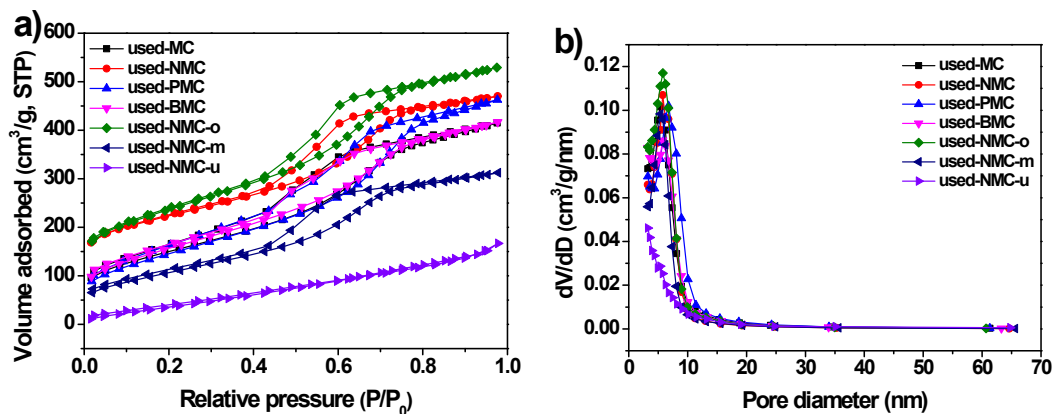

Fig. S2  $\text{N}_2$  sorption isotherms (a) and the corresponding pore size distribution curves (b) of all the used carbon catalysts.

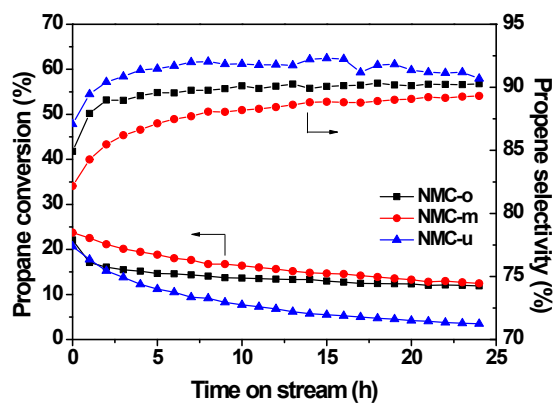

Fig. S3 Propane conversion and propene selectivity in propane dehydrogenation over N-doped mesoporous carbons.

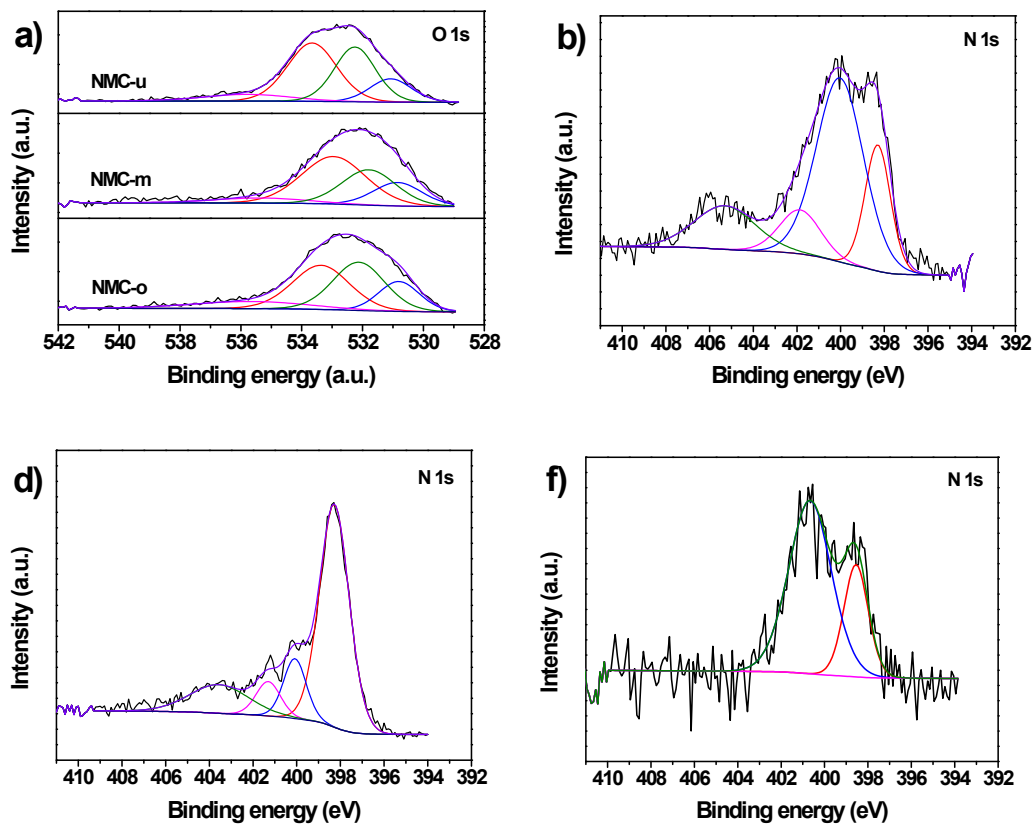

Fig. S4 High-resolution XPS O 1s spectra of N-doped carbons (a), and N 1s spectra of NMC-o (b), NMC-m (d) and NMC-u (f).

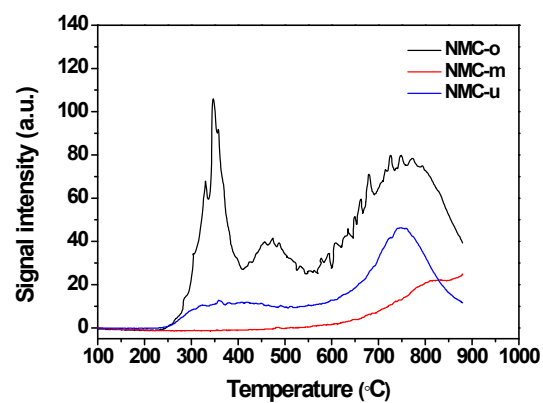

Fig. S5 TPD profiles of N-doped carbons.

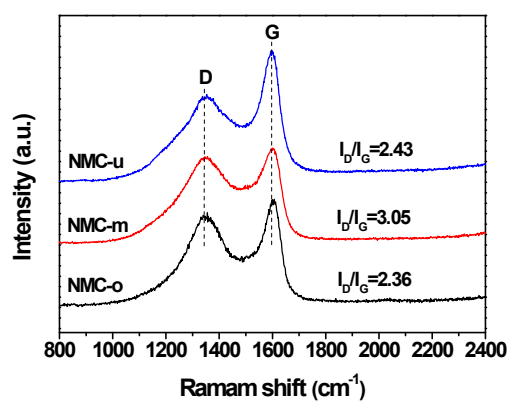

Fig. S6 Raman spectra of N-doped carbons.

**Table S1** Textural properties and specific catalytic activities of N-doped carbons.

| Samples | $S_{BET}$<br>(m <sup>2</sup> /g) | $V_{total}$<br>(cm <sup>3</sup> /g) | $D_{pore}$<br>(nm) | TOF<br>(mmol/g/h) | Initial<br>conversion (%) | Initial<br>selectivity (%) |
|---------|----------------------------------|-------------------------------------|--------------------|-------------------|---------------------------|----------------------------|
| NMC-o   | 844 (813) <sup>a</sup>           | 0.80                                | 5.8                | 38.3              | 22.1                      | 84.9                       |
| NMC-m   | 649 (395)                        | 0.68                                | 5.7                | 48.4              | 23.7                      | 82.2                       |
| NMC-u   | 502 (171)                        | 0.46                                | –                  | 34.2              | 20.7                      | 87.1                       |

<sup>a</sup> Data in the parentheses are corresponding to the used catalysts after 24 h of propane dehydrogenation reaction.

**Table S2** Relative integrated intensity of deconvoluted O 1s, N 1s, P 2p and B 1s XPS spectra for all mesoporous carbons.

| catalysts | O              |              |                |               |                | N              |                      |                     |                      |                     | P              |                      |                                        | B              |                                                    |                      |
|-----------|----------------|--------------|----------------|---------------|----------------|----------------|----------------------|---------------------|----------------------|---------------------|----------------|----------------------|----------------------------------------|----------------|----------------------------------------------------|----------------------|
|           | Total<br>(at%) | C=O<br>(at%) | O=C-O<br>(at%) | C-OH<br>(at%) | Water<br>(at%) | Total<br>(at%) | Pyridinic<br>N (at%) | Pyrrolic<br>N (at%) | Graphitic<br>N (at%) | oxidized<br>N (at%) | Total<br>(at%) | P-C<br>bond<br>(at%) | PO <sub>4</sub><br>tetrahedra<br>(at%) | Total<br>(at%) | C-(BO <sub>3</sub> ) <sub>n</sub><br>bond<br>(at%) | graphitic-B<br>(at%) |
| MC        | 10.33          | 0.95         | 2.86           | 6.21          | 0.31           | –              | –                    | –                   | –                    | –                   | –              | –                    | –                                      | –              | –                                                  | –                    |
| BMC       | 9.89           | 1.29         | 3.46           | 4.70          | 0.44           | –              | –                    | –                   | –                    | –                   | –              | –                    | –                                      | 0.20           | 0.11                                               | 0.09                 |
| PMC       | 7.19           | 1.68         | 1.50           | 3.34          | 0.66           | –              | –                    | –                   | –                    | –                   | 0.31           | 0.18                 | 0.13                                   | –              | –                                                  | –                    |
| NMC       | 4.92           | 0.48         | 2.99           | 1.11          | 0.34           | 5.98           | 2.23                 | 1.87                | 1.25                 | 0.61                | –              | –                    | –                                      | –              | –                                                  | –                    |
| NMC-o     | 7.07           | 1.22         | 2.51           | 2.52          | 0.83           | 6.98           | 1.37                 | 3.70                | 0.77                 | 1.13                | –              | –                    | –                                      | –              | –                                                  | –                    |
| NMC-m     | 4.90           | 0.85         | 1.43           | 2.27          | 0.35           | 7.00           | 4.41                 | 0.91                | 0.56                 | 1.12                | –              | –                    | –                                      | –              | –                                                  | –                    |
| NMC-u     | 8.98           | 1.30         | 3.03           | 3.86          | 0.78           | 2.35           | 0.64                 | 1.71                | –                    | –                   | –              | –                    | –                                      | –              | –                                                  | –                    |

## Reference

- [1] Z. Zhao, Y. Dai, G. Ge, X. Guo, G. Wang, *Phys. Chem. Chem. Phys.*, 2015, **17**, 18895-18899.
- [2] M. Xie, Y. Xia, J. Liang, L. Chen, X. Guo, *Micropor. Mesopor.*, 2014, **197**, 237-243.
